# Supplementary material
Source: PubMed Central journal article supplement (PMC5519242)
Supplement: krnb-14-06-1255397-s001.pdf [file krnb-14-06-1255397-s001.pdf]

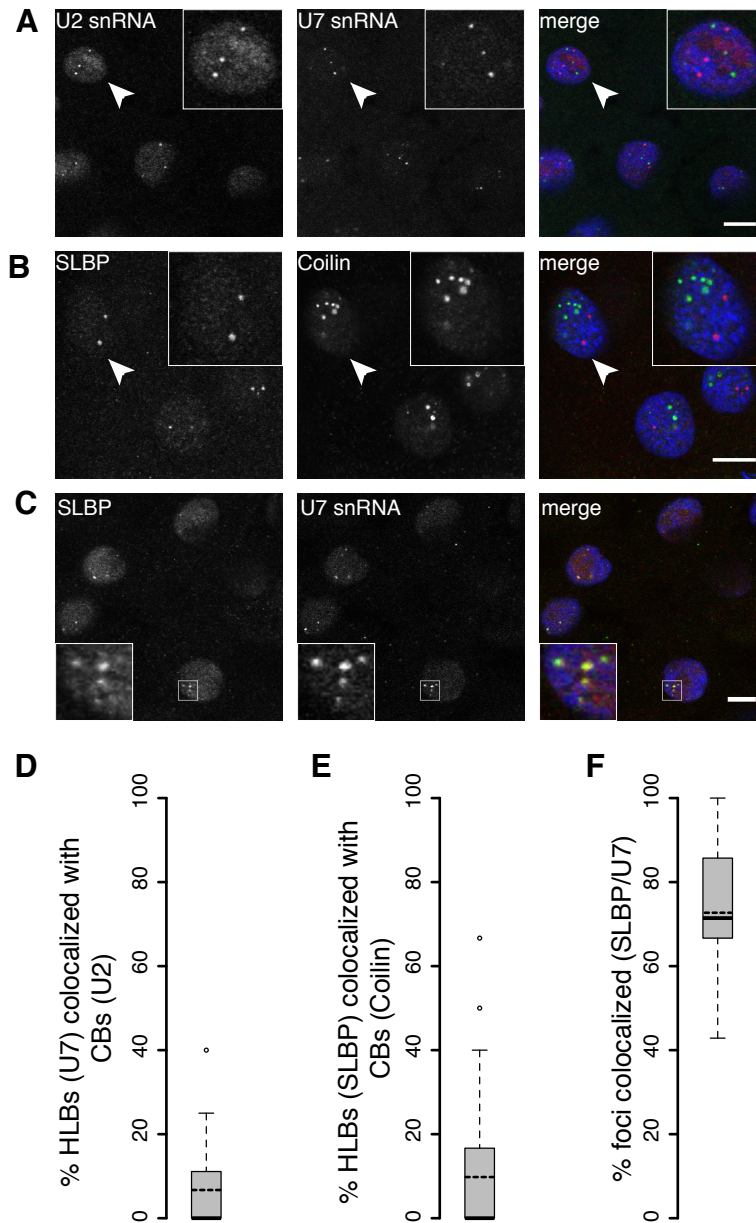

Figure S1: CBs and HLBs are distinct nuclear bodies in zebrafish embryos.

(A) U2 snRNA and U7 snRNA localize to distinct bodies. Single confocal section of 4hpf zebrafish embryos labeled with microinjected U7 and U2 snRNA (green and red in the merged panel, respectively). Scale bar equals 10  $\mu\text{m}$ . Arrowheads point to the nucleus shown 2x magnified in the inset. (B) Immunostaining for SLBP (red in the merged panel) and Coilin (green in the merged panel) shows that HLBs and CBs are distinct bodies. A single confocal section is displayed. Scale bar equals 10  $\mu\text{m}$ . Arrowheads point to the nucleus shown 1.5x magnified in the inset. (C) Immunostaining for SLBP (red in the merged panel) shows the concentration of SLBP in the same foci as those marked by injected U7 snRNA (green). Scale bar equals 10  $\mu\text{m}$ . Area marked by square is shown 4x magnified in the inset. (D) Quantification of overlapping signals between HLBs and CBs (U2 and U7 snRNAs, as in A;  $n=13$  nuclei). Distribution, mean number (dashed line) and median number (bold line) are shown. (E) Quantification of HLBs colocalized with CBs (SLBP and Coilin immunostaining, as in (B); data from  $n=40$  nuclei from 2 independent experiments at 4hpf). Distribution, mean number (dashed line) and median number (bold line) are shown. (F) Quantification of colocalization of SLBP foci and U7 foci (immunostaining as in Figure 2B and S1C; data from  $n=9$  nuclei at blastula stage. Distribution, mean number (dashed line) and median number (bold line) are shown.)

| <b>Table S1: Primers used in this study</b> |                                                                                            |                                     |
|---------------------------------------------|--------------------------------------------------------------------------------------------|-------------------------------------|
| <b>Name</b>                                 | <b>Sequence (5' &gt; 3')</b>                                                               | <b>purpose</b>                      |
| T7_hU2snRNA_for                             | TAATACGACTCACTATAGGGATCGCTTC<br>TCGGCCTTTTGGCTAAG                                          | generate U2 IVT template            |
| hU2snRNA_rev                                | TGGTGCACCGTTCCTGGAGGTACTGCAA<br>TACC                                                       | generate U2 IVT template            |
| T7-U4 for                                   | TAATACGACTCACTATAGGGAGCTTTGC<br>GCAGTGGCAGTATCGTAGC                                        | generate U4 IVT template            |
| U4wtModII rev                               | CAGTCTCCGTAGAGACTGTCA                                                                      | generate U4 IVT template            |
| T7-mMU7-anti                                | AGGGGTTTTCCGACCGAAGTCAGAAAA<br>CCTGCTAGACAAATTCTAAAAGAGCTGT<br>AACACTTCCCTATAGTGAGTCGTATTA | generate mU7 IVT template           |
| T7-promoter                                 | TAATACGACTCACTATAGGG                                                                       | T7 promoter for IVT                 |
| T7-zfU7-anti                                | ATGGGTTTCCTTTTAAAGGAAACCTACT<br>GGACAAATAGTAAAAGAGATATTTTCC<br>AACCTATAGTGAGTCGTATTA       | generate zfU7 IVT template          |
| T7-U7OPTanti                                | AGGGGTTTTCCGACCGAAGTCAGAAAA<br>CCTGCTCCAAAAATTCTAAAAGAGCTGT<br>AACACTTCCCTATAGTGAGTCGTATTA | generate U7smOPT IVT template       |
| T7-U7OPT                                    | TAATACGACTCACTATAGGGAAGTGTTA<br>CAGCTCTTTTAGAATTTTGGAGCAGGTT<br>TTCTGACTTCGGTCGGAAAACCCCT  | generate U7smOPT IVT template       |
| zfU7-A_mutant                               | ATGGGTTTCCTTTTAAAGGAAACCTACT<br>GGACAAATAGTAAAAGAGATAAAAACC<br>AACCTATAGTGAGTCGTATTA       | generate U7-A-mutant IVT template   |
| zfU7-HDE_mutant                             | ATGGGTTTCCTTTTAAAGGAAACCTACT<br>GGACAAATACTACCGAAGTCACCTGTG<br>GCCCTATAGTGAGTCGTATTA       | generate U7-HDE-mutant IVT template |
| 5'-ETS-18S-rRNA_F                           | TCTCTCCTCTACCACTCTGCTC                                                                     | pre-rRNA quantitation               |
| 5'-ETS-18S-rRNA_R                           | GCCGTGTGCACTTAGACCT                                                                        | pre-rRNA quantitation               |
| ND3-ND4I mtRNA_F                            | CCTACGAATGAGCCCAAGG                                                                        | normalization of qPCR data          |
| ND3-ND4I mtRNA_R                            | CGGTGAAATGTAAGTCCTGCT                                                                      | normalization of qPCR data          |
